# Supplementary material for: Expression of Wheat High Molecular Weight Glutenin Subunit 1Bx Is Affected by Large Insertions and Deletions Located in the Upstream Flanking Sequences
Source: PubMed Central journal article supplement (PMC4136844; doi:10.1371/journal.pone.0105363), 2014-08-18
Supplement: pone.0105363.s002.pdf [file pone.0105363.s002.pdf]

PKO-1Bx7 TGATGTGCCCTTGCTTGAATTTCAACATAGTGTGGTAAATTAAGTGGTACTAACAAGAGCATATGCAATGTGTCAGTTTTTCTTCTGCCCCAAGGAAATTTAAGCCCTTTGTGTAACACACACA  
PKO-1Bx7OX TGATGTGCCCTTGCTTGAATTTCAACATAGTGTGGTAAATTAAGTGGTACTAACAAGAGCATATGCAATGTGTCAGTTTTTCTTCTGCCCCAAGGAAATTTAAGCCCTTTGTGTAACACACACA  
PKO-1Bx13 TGATGTGCCCTTGCTTGAATTTCAACATAGTGTGGTAAATTAAGTGGTACTAACAAGAGCATATGCAATGTGTCAGTTTTTCTTCTGCCCCAAGGAAATTTAAGCCCTTTGTGTAACACACACA  
PKO-1Bx14 TGATGTGCCCTTGCTTGAATTTCAACATAGTGTGGTAAATTAAGTGGTACTAACAAGAGCATATGCAATGTGTCAGTTTTTCTTCTGCCCCAAGGAAATTTAAGCCCTTTGTGTAACACACACA

PKO-1Bx7 GAGACAACCTACAAACAAACATCTCTGAAAGAAATTTAGCCAAATACATTTGTAACACTATCTTGGGATATGTCCAAGGTCCTGCTGGTATCTCCTTGCATGACGTGATAGTAAAGTAGCTTCTTGG  
PKO-1Bx7OX GAGACAACCTACAAACAAACATCTCTGAAAGAAATTTAGCCAAATACATTTGTAACACTATCTTGGGATATGTCCAAGGTCCTGCTGGTATCTCCTTGCATGACGTGATAGTAAAGTAGCTTCTTGG  
PKO-1Bx13 GAGACAACCTACAAACAAACATCTCTGAAAGAAATTTAGCCAAATACATTTGTAACACTATCTTGGGATATGTCCAAGGTCCTGCTGGTATCTCCTTGCATGACGTGATAGTAAAGTAGCTTCTTGG  
PKO-1Bx14 GAGACAACCTACAAACAAACATCTCTGAAAGAAATTTAGCCAAATACATTTGTAACACTATCTTGGGATATGTCCAAGGTCCTGCTGGTATCTCCTTGCATGACGTGATAGTAAAGTAGCTTCTTGG

PKO-1Bx7 ATAAGATTTGAAAATTTCTCCTTGCTGGGTC.AATAATTTGTTTTTCTCTCTCTCAAGGAGTCTCTCATTCCATTCTTTAATTCATTATGCTCCCTAAATTTGGAGCTCTCCCATCC  
PKO-1Bx7OX ATAAGATTTGAAAATTTCTCCTTGCTGGGTC.AATAATTTGTTTTTCTCTCTCTCAAGGAGTCTCTCATTCCATTCTTTAATTCATTATGCTCCCTAAATTTGGAGCTCTCCCATCC  
PKO-1Bx13 ATAAGATTTGAAAATTTCTCCTTGCTGGGTC.AATAATTTGTTTTTCTCTCTCTCAAGGAGTCTCTCATTCCATTCTTTAATTCATTATGCTCCCTAAATTTGGAGCTCTCCCATCC  
PKO-1Bx14 ATAAGATTTGAAAATTTCTCCTTGCTGGGTC.AATAATTTGTTTTTCTCTCTCTCAAGGAGTCTCTCATTCCATTCTTTAATTCATTATGCTCCCTAAATTTGGAGCTCTCCCATCC

PKO-1Bx7 ATTGAAATATTCAATTTTAGATTTGGTTTCACAAATTTTGAATGGGTCGATGGTATCAATCCCGCCATCTCTCCACCATAAAA.AAAAGAGTCAATATATGATATTTGATAGCATTAAATACA  
PKO-1Bx7OX ATTGAAATATTCAATTTTAGATTTGGTTTCACAAATTTTGAATGGGTCGATGGTATCAATCCCGCCATCTCTCCACCATAAAA.AAAAGAGTCAATATATGATATTTGATAGCATTAAATACA  
PKO-1Bx13 ATTGAAATATTCAATTTTAGATTTGGTTTCACAAATTTTGAATGGGTCGATGGTATCAATCCCGCCATCTCTCCACCATAAAA.AAAAGAGTCAATATATGATATTTGATAGCATTAAATACA  
PKO-1Bx14 ATTGAAATATTCAATTTTAGATTTGGTTTCACAAATTTTGAATGGGTCGATGGTATCAATCCCGCCATCTCTCCACCATAAAA.AAAAGAGTCAATATATGATATTTGATAGCATTAAATACA

PKO-1Bx7 TACATGTAGCCACCGACATGGAAAACGTCCTATGCAATAGTATGTTGATTAATGAAAACCTCATAATCACCACATGCAATTTTATAAATAAAAAGAAAATACACTTCATCATCTTCCCTCAC  
PKO-1Bx7OX TACATGTAGCCACCGACATGGAAAACGTCCTATGCAATAGTATGTTGATTAATGAAAACCTCATAATCACCACATGCAATTTTATAAATAAAAAGAAAATACACTTCATCATCTTCCCTCAC  
PKO-1Bx13 TACATGTAGCCACCGACATGGAAAACGTCCTATGCAATAGTATGTTGATTAATGAAAACCTCATAATCACCACATGCAATTTTATAAATAAAAAGAAAATACACTTCATCATCTTCCCTCAC  
PKO-1Bx14 TACATGTAGCCACCGACATGGAAAACGTCCTATGCAATAGTATGTTGATTAATGAAAACCTCATAATCACCACATGCAATTTTATAAATAAAAAGAAAATACACTTCATCATCTTCCCTCAC

PKO-1Bx7 CACC.AAGCCAAATACTCCATCTGTTTTCTTTGACCAAGTTCACAAACCAAAACATCAATATCCATAATACTAAATAAATAAATAATGAAAATTCGTTTTCACTGCTTAATCCAAATGATATCG  
PKO-1Bx7OX CACC.AAGCCAAATACTCCATCTGTTTTCTTTGACCAAGTTCACAAACCAAAACATCAATATCCATAATACTAAATAAATAAATAATGAAAATTCGTTTTCACTGCTTAATCCAAATGATATCG  
PKO-1Bx13 CACC.AAGCCAAATACTCCATCTGTTTTCTTTGACCAAGTTCACAAACCAAAACATCAATATCCATAATACTAAATAAATAAATAATGAAAATTCGTTTTCACTGCTTAATCCAAATGATATCG  
PKO-1Bx14 CACC.AAGCCAAATACTCCATCTGTTTTCTTTGACCAAGTTCACAAACCAAAACATCAATATCCATAATACTAAATAAATAAATAATGAAAATTCGTTTTCACTGCTTAATCCAAATGATATCG

PKO-1Bx7 CTTGATATTATGGATATTTATGTATTTCTCTACAAATTTGATCAAACTTTAAAAGGTTTAACTTCTCAAAAAAAAACCTAAATACCTTTTATATTTTAAAACAGAGAGAGTAGTTTTTT  
PKO-1Bx7OX CTTGATATTATGGATATTTATGTATTTCTCTACAAATTTGATCAAACTTTAAAAGGTTTAACTTCTCAAAAAAAAACCTAAATACCTTTTATATTTTAAAACAGAGAGAGTAGTTTTTT  
PKO-1Bx13 CTTGATATTATGGATATTTATGTATTTCTCTACAAATTTGATCAAACTTTAAAAGGTTTAACTTCTCAAAAAAAAACCTAAATACCTTTTATATTTTAAAACAGAGAGAGTAGTTTTTT  
PKO-1Bx14 CTTGATATTATGGATATTTATGTATTTCTCTACAAATTTGATCAAACTTTAAAAGGTTTAACTTCTCAAAAAAAAACCTAAATACCTTTTATATTTTAAAACAGAGAGAGTAGTTTTTT

PKO-1Bx7 TTACCCAAACCCCAACTGCCAGCAAAGCGCGCTCAACTCTTCTAGTCTAAATAAAGTAGCATCCACTAACACATTTCTCCCGACATGCAAGCACGTCACCTATGAAAATGCCACCTCAC  
PKO-1Bx7OX TTACCCAAACCCCAACTGCCAGCAAAGCGCGCTCAACTCTTCTAGTCTAAATAAAGTAGCATCCACTAACACATTTCTCCCGACATGCAAGCACGTCACCTATGAAAATGCCACCTCAC  
PKO-1Bx13 TTACCCAAACCCCAACTGCCAGCAAAGCGCGCTCAACTCTTCTAGTCTAAATAAAGTAGCATCCACTAACACATTTCTCCCGACATGCAAGCACGTCACCTATGAAAATGCCACCTCAC  
PKO-1Bx14 T.ACCCAAACCCCAACTGCCAGCAAAGCGCGCTCAACTCTTCTAGTCTAAATAAAGTAGCATCCACTAACACATTTCTCCCGACATGCAAGCACGTCACCTATGAAAATGCCACCTCAC

PKO-1Bx7 TATGCAACCATGCATAGAAAGAAAGCTCACCTCAGCATGCAAAACATGCAAGCATAAATTTCCATTTTACTTGGCTATTTATGTTTGATAAATATTTTCACAAATATACAAATATCAAAAAACAA  
PKO-1Bx7OX TATGCAACCATGCATAGAAAGAAAGCTCACCTCAGCATGCAAAACATGCAAGCATAAATTTCCATTTTACTTGGCTATTTATGTTTGATAAATATTTTCACAAATATACAAATATCAAAAAACAA  
PKO-1Bx13 TATGCAACCATGCATAGAAAGAAAGCTCACCTCAGCATGCAAAACATGCAAGCATAAATTTCCATTTTACTTGGCTATTTATGTTTGATAAATATTTTCACAAATATACAAATATCAAAAAACAA  
PKO-1Bx14 TATGCAACCATGCATAGAAAGAAAGCTCACCTCAGCATGCAAAACATGCAAGCATAAATTTCCATTTTACTTGGCTATTTATGTTTGATAAATATTTTCACAAATATACAAATATCAAAAAACAA

PKO-1Bx7 AAAATATATGTGTTTTAGTTTTAGTTTCTCATATCCAAATATACATGTTTTCATACAAACAAATCTCATTTAAATATATTGTAATAATATTCGGGCAACAACTTGTGGGG.....  
PKO-1Bx7OX AAAATATATGTGTTTTAGTTTTAGTTTCTCATATCCAAATATACATGTTTTCATACAAACAAATCTCATTTAAATATATTGTAATAATATTCGGGCAACAACTTGTGGGGGECCTTAAATAT  
PKO-1Bx13 AAAATATATGTGTTTTAGTTTTAGTTTCTCATATCCAAATATACATGTTTTCATACAAACAAATCTCATTTAAATATATTGTAATAATATTCGGGCAACAACTTGTGGGG.....  
PKO-1Bx14 AAAATATATGTGTTTTAGTTTTAGTTTCTCATATCCAAATATACATGTTTTCATACAAACAAATCTCATTTAAATATATTGTAATAATATTCAGCAACAACTTGTGGGG.....

PKO-1Bx7 .....TACATCTAGTTACAGTGGAAATATTAGTGTATGGCGTGACCAAGCGATAAAGGCCAACGAGAGAAAGACTGCGCTCGTCTATGGAGGCCAGGC  
PKO-1Bx7OX TTGTAAAAATATTCGGCAACAACTTGTGGGGTACATCTAGTTACAGTGGAAATATTAGTGTATGGCGTGACCAAGCGATAAAGGCCAACGAGAGAAAGACTGCGCTCGTCTATGGAGGCCAGGC  
PKO-1Bx13 .....TACATCTAGTTACAGTGGAAATATTAGTGTATGGCGTGACCAAGCGATAAAGGCCAACGAGAGAAAGACTGCGCTCGTCTATGGAGGCCAGGC  
PKO-1Bx14 .....TACATCTAGTTACAGTGGAAATATTAGTGTATGGCGTGACCAAGCGATAAAGGCCAACGAGAGAAAGACTGCGCTCGTCTATGGAGGCCAGGC

```

Pro-1Bx7      AAAGACAATGGACATGCAAAAGAGGTAGGGGCCAGGGGAAGAAACACTTGGAGATCATAGAAGAACATAAGAGGTTAAACATAGGAG.....
Pro-1Bx7OE   AAAGACAATGGACATGCAAAAGAGGTAGGGGCCAGGGGAAGAAACACTTGGAGATCATAGAAGAACATAAGAGGTTAAACATAGGAG.....
Pro-1Bx13    AAAGACAATGGACATGCAAAAGAGGTAGGGGCCAGGGGAAGAAACACTTGGAGATCATAGAAGAACATAAGAGGTTAAACATAGGAG.....
Pro-1Bx14    AAAGACAATGGACATGCAAAAGAGGTAGGGGCCAGGGGAAGAAACACTTGGAGATCATAGAAGAACATAAGAGGTTAAACATAGGAGCAGTGGCGGAGCTTGGCGTGAATTTATGAGGGGGC

Pro-1Bx7      .....
Pro-1Bx7OE   .....
Pro-1Bx13    .....
Pro-1Bx14    AATGGGCTGGAGGGGCAAGAAATATGAGCTTGGGCTGATTTAACTGGGCATATGGGCTGAATACTAGGGGATATATGCTAGTTTTCTCATGGGCTGGGGGGCAATGGCCACGGTTGC

Pro-1Bx7      .....GGCATAATGGACAATTAAATCTACATTAATTGAACTCATTTGGGAAGTAAACAAAATCCATATTTCTGGTGTAAATCAAACCTATTTGACGCC
Pro-1Bx7OE   .....GGCATAATGGACAATTAAATCTACATTAATTGAACTCATTTGGGAAGTAAACAAAATCCATATTTCTGGTGTAAATCAAACCTATTTGACGCC
Pro-1Bx13    .....GGCATAATGGACAATTAAATCTACATTAATTGAACTCATTTGGGAAGTAAACAAAATCCATATTTCTGGTGTAAATCAAACCTATTTGACGCC
Pro-1Bx14    CTCCACTAAGCTCCGCCACTGCAATAGGAGGGCAATATGGACAATTAAATCTACATTAATTGAACTCATTTGGGAAGTAAACAAAATCCATATTTCTGGTGTAAATCAAACCTATTTGATGCC

Pro-1Bx7      GATTTACTAAGATCCCTATGTTAAATTTTAGACATGACTGGCCAAAGGTTTCAGTTAGTTCAATTTGTCACGGAAAGGTGTTTTCCATAAGTCCAAAACCTCTACCAAACCTTTTTTGACCGTCATJ
Pro-1Bx7OE   GATTTACTAAGATCCCTATGTTAAATTTTAGACATGACTGGCCAAAGGTTTCAGTTAGTTCAATTTGTCACGGAAAGGTGTTTTCCATAAGTCCAAAACCTCTACCAAACCTTTTTTGACCGTCATJ
Pro-1Bx13    GATTTACTAAGATCCCTATGTTAAATTTTAGACATGACTGGCCAAAGGTTTCAGTTAGTTCAATTTGTCACGGAAAGGTGTTTTCCATAAGTCCAAAACCTCTACCAAACCTTTTTTGACCGTCATJ
Pro-1Bx14    GATTTACTAAGATCCCTATGTTAAATTTTAGACATGACTGGCCAAAGGTTTCAGTTAGTTCAATTTGTCACGGAAAGGTGTTTTCCATAAGTCCAAAACCTCTACCAAACCTTTTTTGACCGTCATJ

Pro-1Bx7      GCATAGATAGATGTTGTGAGTCATTGGATAGATATTGTGAGTCAGCATGGATTTGTGTTGCCCTGGAAATCCAACTAAATGACAAAGCAACAAAACCTGAAATGGGCTTTAGGAGAGATGG
Pro-1Bx7OE   GCATAGATAGATGTTGTGAGTCATTGGATAGATATTGTGAGTCAGCATGGATTTGTGTTGCCCTGGAAATCCAACTAAATGACAAAGCAACAAAACCTGAAATGGGCTTTAGGAGAGATGG
Pro-1Bx13    GCATAGATAGATGTTGTGAGTCATTGGATAGATATTGTGAGTCAGCATGGATTTGTGTTGCCCTGGAAATCCAACTAAATGACAAAGCAACAAAACCTGAAATGGGCTTTAGGAGAGATGG
Pro-1Bx14    GCATAGATAGATGTTGTGAGTCATTGGATAGATATTGTGAGTCAGCATGGATTTGTGTTGCCCTGGAAATCCAACTAAATGACAAAGCAACAAAACCTGAAATGGGCTTTAGGAGAGATGG

Pro-1Bx7      TTATCAAATTTACATGTTCCATGCAAGGCTACCTTCCACTACTCGACATGTTAGAAAGTTTTGAGTGCCTGCATATTTGCGGAAGCAATGGCACTACTCGACATGTTAGAAAGTTTTGAGTGC
Pro-1Bx7OE   TTATCAAATTTACATGTTCCATGCAAGGCTACCTTCCACTACTCGACATGTTAGAAAGTTTTGAGTGCCTGCATATTTGCGGAAGCAATGGCACTACTCGACATGTTAGAAAGTTTTGAGTGC
Pro-1Bx13    TTATCAAATTTACATGTTCCATGCAAGGCTACCTTCCACTACTCGACATGTTAGAAAGTTTTGAGTGCCTGCATATTTGCGGA.....
Pro-1Bx14    TTATCAAATTTACATGTTCCATGCAAGGCTACCTTCCACTACTCGACATGTTAGAAAGTTTTGAGTGCCTGCATATTTGCGGAAGCAATGGCACTACTCGACATGTTAGAAAGTTTTGAGTGC

Pro-1Bx7      CGCATATTTGCGGAAGCAATGGCTAACAGATACATATTTCTGCCAAACCCCAAGAAAGGATAATCACTCCCTCTTAGATAAAAAGAACAGACCAATGTACAAACATCCACACTTCTGCCAAACJ
Pro-1Bx7OE   CGCATATTTGCGGAAGCAATGGCTAACAGATACATATTTCTGCCAAACCCCAAGAAAGGATAATCACTCCCTCTTAGATAAAAAGAACAGACCAATGTACAAACATCCACACTTCTGCCAAACJ
Pro-1Bx13    .....AGCAATGGCTAACAGATACATATTTCTGCCAAACCCCAAGAAAGGATAATCACTCCCTCTTAGATAAAAAGAACAGACCAATGTACAAACATCCACACTTCTGCCAAACJ
Pro-1Bx14    CGCATATTTGCGGAAGCAATGGCTAACAGATACATATTTCTGCCAAACCCCAAGAAAGGATAATCACTCCCTCTTAGATAAAAAGAACAGACCAATGTACAAACATCCACACTTCTGCCAAACJ

Pro-1Bx7      ATACACCAGAAGCTAGGATTAAGCCCATTAAGCTGGCTTTAGCAGACCGTCCAAAAATCTGTTTTGCAAGCACCAATTGCTCCCTTACTTATCCAGCTTCTTTTTGTTGTTGGCAAACTGCCCT
Pro-1Bx7OE   ATACACCAGAAGCTAGGATTAAGCCCATTAAGCTGGCTTTAGCAGACCGTCCAAAAATCTGTTTTGCAAGCACCAATTGCTCCCTTACTTATCCAGCTTCTTTTTGTTGTTGGCAAACTGCCCT
Pro-1Bx13    ATACACCAGAAGCTAGGATTAAGCCCATTAAGCTGGCTTTAGCAGACCGTCCAAAAATCTGTTTTGCAAGCACCAATTGCTCCCTTACTTATCCAGCTTCTTTTTGTTGTTGGCAAACTGCCCT
Pro-1Bx14    ATACACCAGAAGCTAGGATTAAGCCCATTAAGCTGGCTTTAGCAGACCGTCCAAAAATCTGTTTTGCAAGCACCAATTGCTCCCTTACTTATCCAGCTTCTTTTTGTTGTTGGCAAACTGCCCT

Pro-1Bx7      TTCCAAACCGATTTTGTCTTCTCAGCGCTTCTTTCATAGGCTAAACTAACTCGGGGTGCACACAAACCATGTCTGAAACCTTCACCTCGTCCCTATAAAAAGGCCATCCAACTTCACAATC
Pro-1Bx7OE   TTCCAAACCGATTTTGTCTTCTCAGCGCTTCTTTCATAGGCTAAACTAACTCGGGGTGCACACAAACCATGTCTGAAACCTTCACCTCGTCCCTATAAAAAGGCCATCCAACTTCACAATC
Pro-1Bx13    TTCCAAACCGATTTTGTCTTCTCAGCGCTTCTTTCATAGGCTAAACTAACTCGGGGTGCACACAAACCATGTCTGAAACCTTCACCTCGTCCCTATAAAAAGGCCATCCAACTTCACAATC
Pro-1Bx14    TTCCAAACCGATTTTGTCTTCTCAGCGCTTCTTTCATAGGCTAAACTAACTCGGGGTGCACACAAACCATGTCTGAAACCTTCACCTCGTCCCTATAAAAAGGCCATCCAACTTCACAATC

Pro-1Bx7      TCATCATCACCCACAAACACCGAGCACCCCAARTCTACAGATCAAATTCACCTGACAGTTACCTGAGATGGCTAAGCGCCTGGTCCCTC
Pro-1Bx7OE   TCATCATCACCCACAAACACCGAGCACCCCAARTCTACAGATCAAATTCACCTGACAGTTACCTGAGATGGCTAAGCGCCTGGTCCCTC
Pro-1Bx13    TCATCATCACCCACAAACACCGAGCACCCCAARTCTACAGATCAAATTCACCTGACAGTTACCTGAGATGGCTAAGCGCCTGGTCCCTC
Pro-1Bx14    TCATCATCACCCACAAACACCGAGCACCCCAARTCTACAGATCAAATTCACCTGACAGTTACCTGAGATGGCTAAGCGCCTGGTCCCTC

```

**Figure S2. Alignment of four 1Bx promoters (Pro-1Bx7, Pro-1Bx7<sup>OE</sup>, Pro-1Bx13 and Pro-1Bx14).**
