# Supplementary material for: Expression of Wheat High Molecular Weight Glutenin Subunit 1Bx Is Affected by Large Insertions and Deletions Located in the Upstream Flanking Sequences
Source: PubMed Central journal article supplement (PMC4136844; doi:10.1371/journal.pone.0105363), 2014-08-18
Supplement: pone.0105363.s003.pdf [file pone.0105363.s003.pdf]

**A**

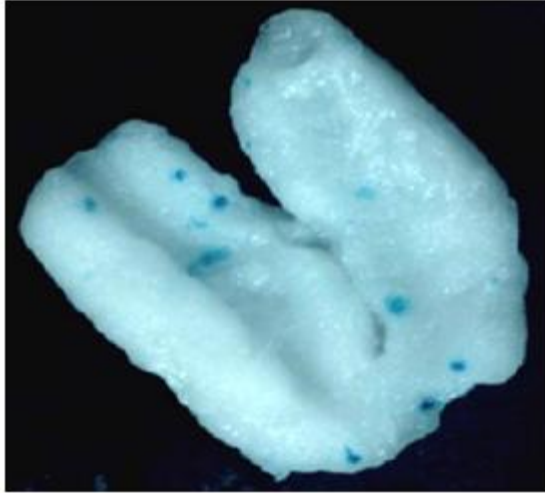

**B**

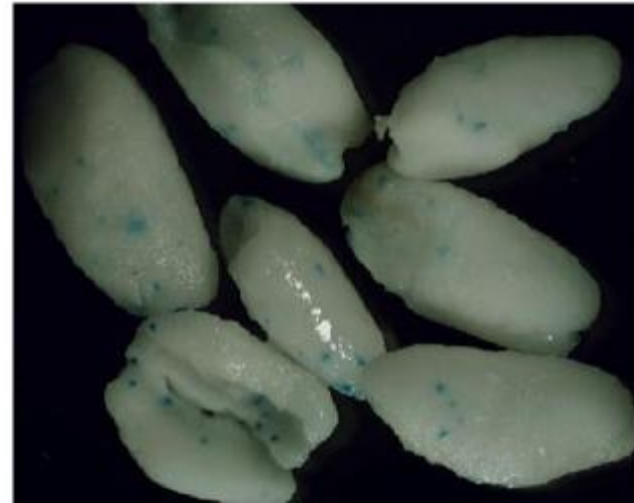

**Figure S3. Representative transient expression results of GUS driven by *Pro-1Bx* in wheat endosperms. (A) *Pro-1Bx13*; (B) *Pro-1Bx7*.**
