# Supplementary material for: Expression of Wheat High Molecular Weight Glutenin Subunit 1Bx Is Affected by Large Insertions and Deletions Located in the Upstream Flanking Sequences
Source: PubMed Central journal article supplement (PMC4136844; doi:10.1371/journal.pone.0105363), 2014-08-18
Supplement: pone.0105363.s006.pdf [file pone.0105363.s006.pdf]

**Table S2. HMW-GS compositions of 6 wheat accessions**

| NO. | Cultivars and Accessions | HMW-GS Compositions |                    |        |
|-----|--------------------------|---------------------|--------------------|--------|
|     |                          | Glu-A1              | Glu-B1             | Glu-D1 |
| 1   | Xiaoyan 54               | 1                   | 14+15              | 2+12   |
| 2   | Atlas 66                 | 2*                  | 13+16              | 2+12   |
| 3   | Chinese Spring           | N                   | 7+8                | 2+12   |
| 4   | Yunmai 33                | 1                   | 7 <sup>OE</sup> +8 | 2+12   |
| 5   | Jimai 20                 | 1                   | 13+16              | 5'+12  |
| 6   | Yanzhan 1                | N                   | 14+15              | 5'+12  |
