# Supplementary material for: Expression of Wheat High Molecular Weight Glutenin Subunit 1Bx Is Affected by Large Insertions and Deletions Located in the Upstream Flanking Sequences
Source: PubMed Central journal article supplement (PMC4136844; doi:10.1371/journal.pone.0105363), 2014-08-18
Supplement: pone.0105363.s007.pdf [file pone.0105363.s007.pdf]

**Table S3. Details of 12 known endosperm-specific *cis*-elements in *1Bx* promoters.**

| Name                          | 1Bx7                                            | 1Bx7 <sup>OE</sup>                             | 1Bx13                                           | 1Bx14                                               | Source                   |
|-------------------------------|-------------------------------------------------|------------------------------------------------|-------------------------------------------------|-----------------------------------------------------|--------------------------|
| <b>DOF recognition sites</b>  |                                                 |                                                |                                                 |                                                     |                          |
| P-box1(TGCAAAG)               | -994                                            | -944                                           | -890                                            | -1129                                               | Sugiyama et al., 1985    |
| P-box2(TGCAAAC)               | -1239,-311                                      | -1282,-270                                     | -1184, -311                                     | -1424,-311                                          | Norre et al., 2002       |
| P-box 3(TGCAAG)               | -2042,-1310,<br>-241,-2020                      | -2084,-1353,<br>-241,-2062                     | -1256,-241,<br>-1963                            | -2224,-1495,<br>-241, -2203                         | Thomas and Flavell, 1990 |
| <b>bZIP recognition sites</b> |                                                 |                                                |                                                 |                                                     |                          |
| Skn-1 like motif(GTCAT)       | -669,-644,<br>-751,-586                         | -669,-644,<br>-710,-585                        | -615,-590,<br>-698,-532                         | -669,-644,<br>-752,-586                             | Blackwell et al., 1994   |
| GCN4-like(GTGAGTCAT)          | -648                                            | -648                                           | -594                                            | -648                                                | Albani et al., 1997      |
| G-box like(TGACGT)            | -1302,-670                                      | -1318,-670                                     | -1248,-617                                      | -1487,-670                                          | Menkens et al., 1995     |
| <b>MYB recognition sites</b>  |                                                 |                                                |                                                 |                                                     |                          |
| AACA/TA motif 1(TAACAA)       | -2179                                           | -2220                                          | -2114,                                          | -2361                                               | Diaz et al., 2002        |
| AACA/TA motif 2(AACAAA)       | -2178,-825,<br>-577,-171                        | -2219,-825,<br>-577,-171                       | -2113,-771,<br>-523,-171                        | -2360,-825,<br>-577,-171                            | Diaz et al., 2002        |
| MYB1 AT core(AAACCA)          | -547                                            | -546                                           | -493                                            | -546                                                | Abe et al., 1997         |
| <b>VP1 recognition site</b>   |                                                 |                                                |                                                 |                                                     |                          |
| RY core site(CATGCA)          | -1726,-1312,<br>-1267,-1241,<br>-1233,-946,-525 | -1768,-1356<br>-1310,-1284,<br>-1276,-946,-525 | -1669,-1258,<br>-1213,-1187,<br>-1179,-891,-470 | -1497, -1452,-<br>1426, -1418,<br>-1131, -907,-525, | Suzuki et al., 1997      |
| <b>Basal promoter sites</b>   |                                                 |                                                |                                                 |                                                     |                          |
| TATA like motif(TATAA)        | -91                                             | -91                                            | -91                                             | -91                                                 | Bernard et al., 2010     |
| CCAAT Box(CCAAT)              | -36,-233                                        | -36,-233                                       | -36,-233                                        | -36,-233                                            | Albani and Robert, 1995  |
